# Supplementary material
Source: PubMed Central journal article supplement (PMC9304094)

### First scores

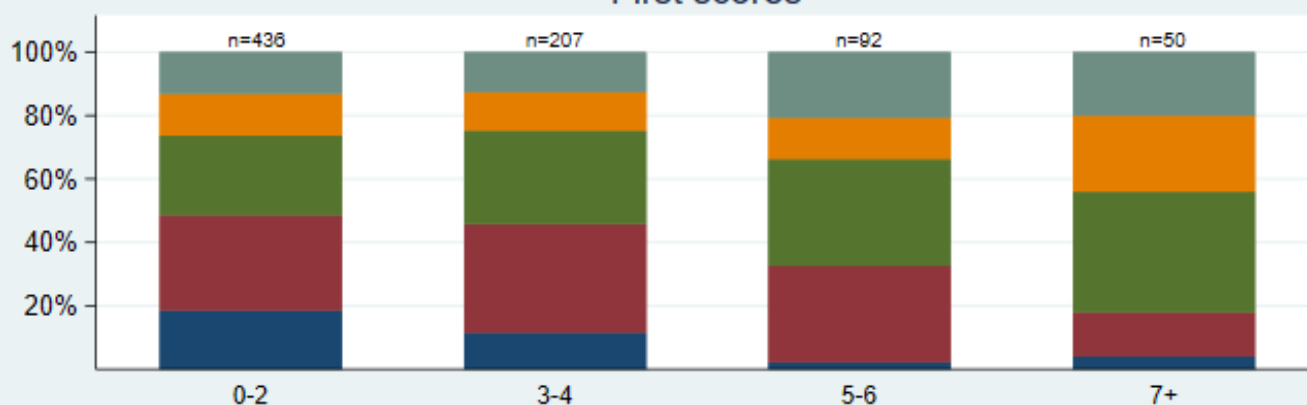

### Maximum scores

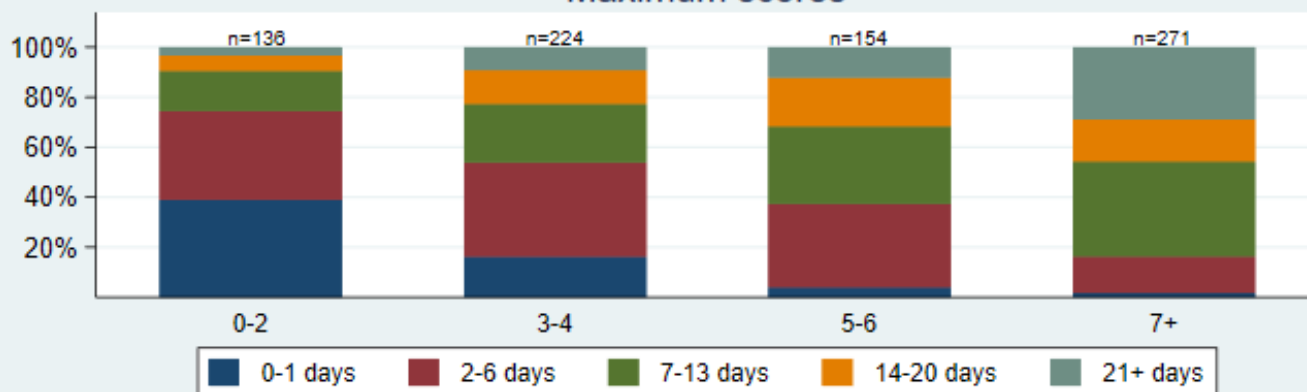

Supplement: emermed-2020-210624supp002.pdf [file emermed-2020-210624supp002.pdf]
