# Supplementary material
Source: PubMed Central journal article supplement (PMC9304094)

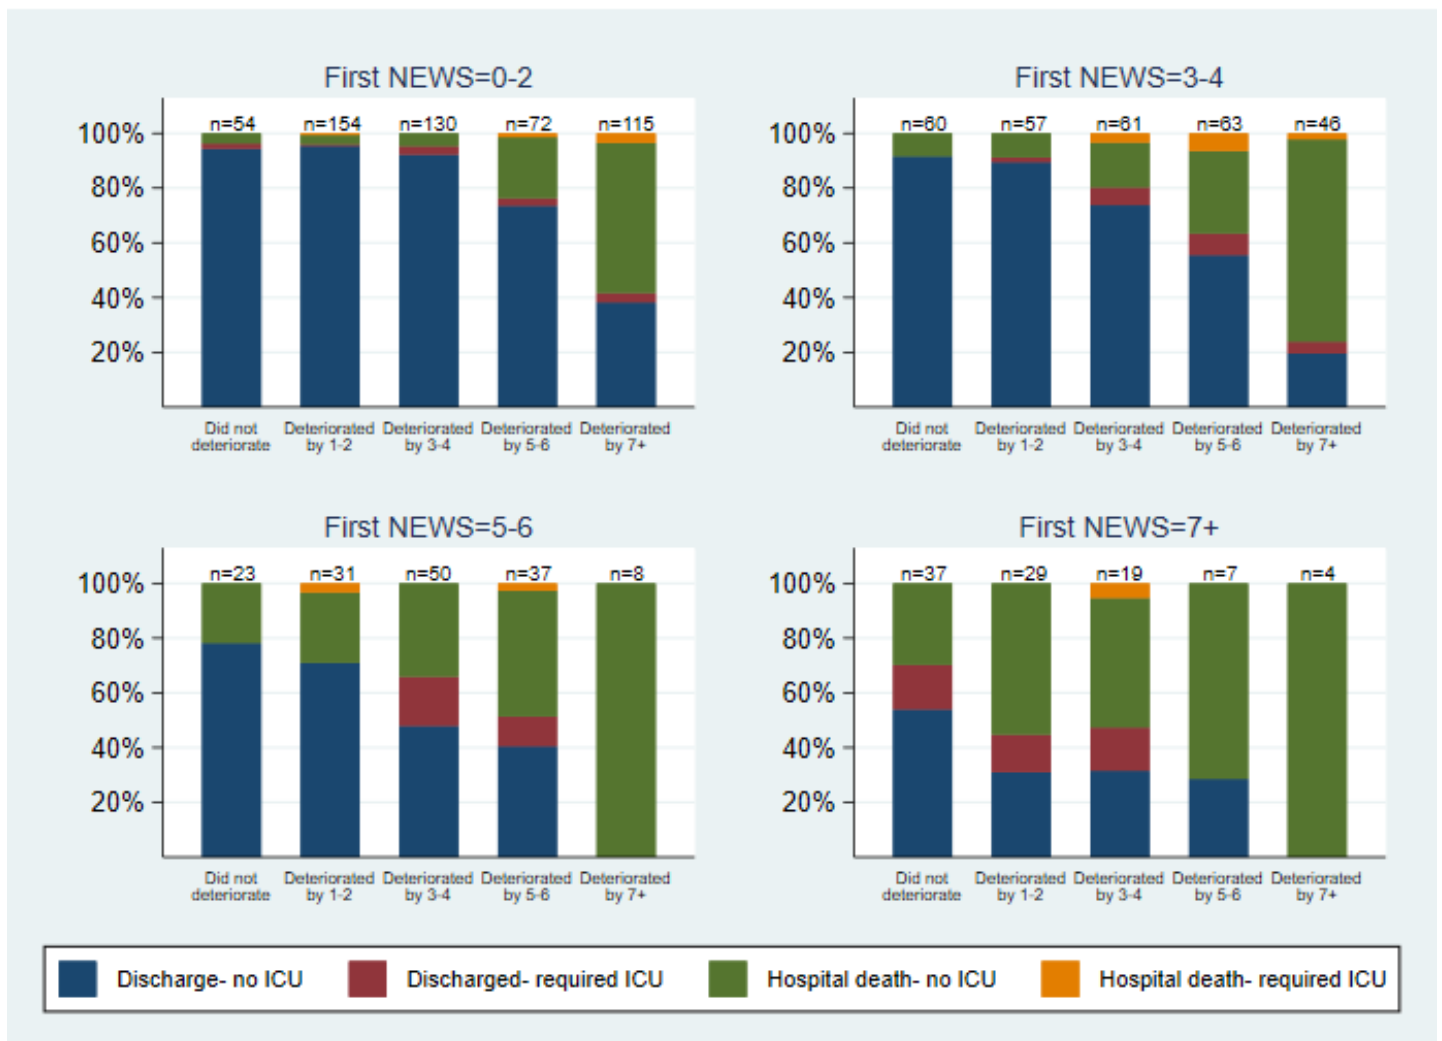

Supplement: emermed-2020-210624supp004.pdf [file emermed-2020-210624supp004.pdf]
